# Supplementary material for: Aggregates of a hydrazono-sulfonamide adduct as picric acid sensors
Source: Royal Society of Chemistry journal article supplement (doi:10.1039/c5ra17359k), 2015-01-01
Supplement: c5ra17359k1.pdf [file c5ra17359k1.pdf]

## *Supporting Information*

### **Aggregates of hydrazono-sulfonamide adduct as picric acid sensor**

*Vaithiyathan Mahendran and Sivakumar Shanmugam\**

Department of Organic Chemistry, School of Chemistry, Madurai Kamaraj University,  
Madurai-625 021, India.

### **Contents**

|                                                                  |                |
|------------------------------------------------------------------|----------------|
| General Methods                                                  | <b>S2</b>      |
| NMR and Mass spectra for <b>AVM</b>                              | <b>S4-S7</b>   |
| Absorption spectra                                               | <b>S8-S9</b>   |
| Stern-Volmer plot                                                | <b>S10</b>     |
| Absorption and emission spectral overlap                         | <b>S11</b>     |
| Optimized coordinate tables                                      | <b>S12-S14</b> |
| Calibration plot for detection limit                             | <b>S15</b>     |
| Fluorescence changes of <b>AVM</b> in the presence of other NACs | <b>S16</b>     |

## General Methods

Unless stated otherwise, all solvents and chemicals were obtained from commercial sources and used without further purification. Analytical thin layer chromatography (TLC) was performed on precoated silica gel-G plates (Merck) using a mixture of petroleum ether (60-80 °C) and ethyl acetate (7:3) as the eluent. The  $^1\text{H}$  and  $^{13}\text{C}$  NMR spectra were recorded on a Bruker (Avance) 300 MHz instrument using TMS as an internal standard and  $\text{CDCl}_3$  as solvent. Chemical shifts are expressed in parts per million (ppm) and the coupling constants ( $J$  values) are expressed in hertz (Hz). The following abbreviations are used to indicate spin multiplicities: s (singlet), m (multiplet). Elemental analyses were carried out with Perkin-Elmer 2400 series II analyzer. Melting points were determined using open capillaries and were uncorrected. Absorption measurements were carried out in Agilent single beam UV-Diode Array spectrophotometer. Fluorescence spectra were recorded in Agilent Cary Eclipse Fluorescence spectrophotometer. The slit width was 5 nm for both excitation and emission. HPLC grade solvents were used for photophysical measurements. The stock solution of **AVM** was prepared in tetrahydrofuran (THF) for AIEE studies.

The crystal structure of compound **AVM** has been deposited at the Cambridge Crystallographic Data Centre and allocated the deposition number **CCDC 1404294**

**Caution!** The nitroaromatic compounds used in this study, specially TNT and picric acid, are very powerful explosives. They must be handled with care and also in very small quantities.

***NMR and Mass spectra for AVM***

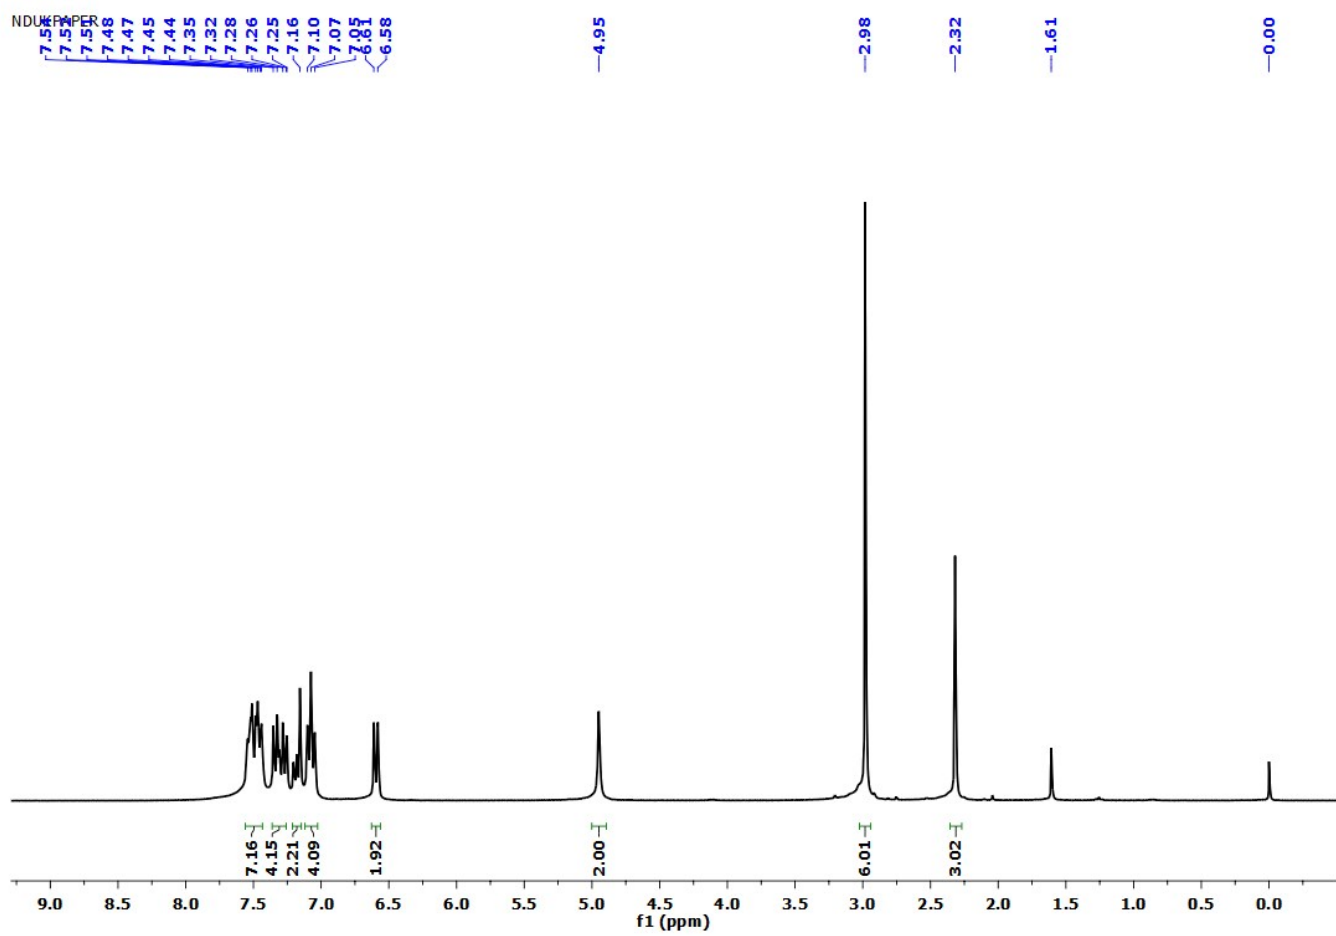

**Figure S1.** <sup>1</sup>H NMR (CDCl<sub>3</sub>, 300 MHz) spectrum of AVM

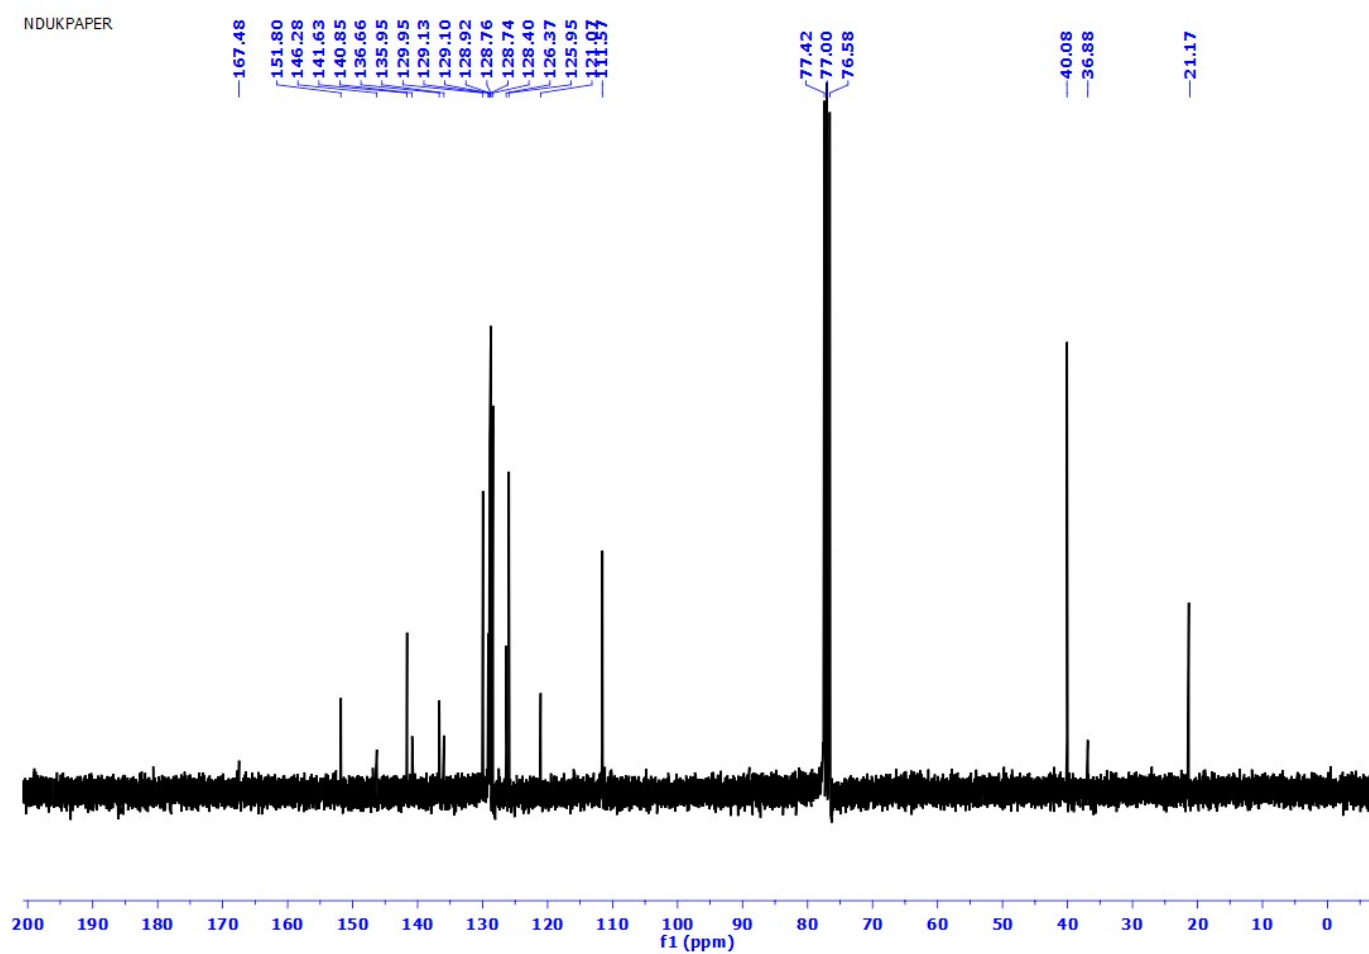

Figure S2.  $^{13}\text{C}$  NMR ( $\text{CDCl}_3$ , 75 MHz) spectrum of AVM

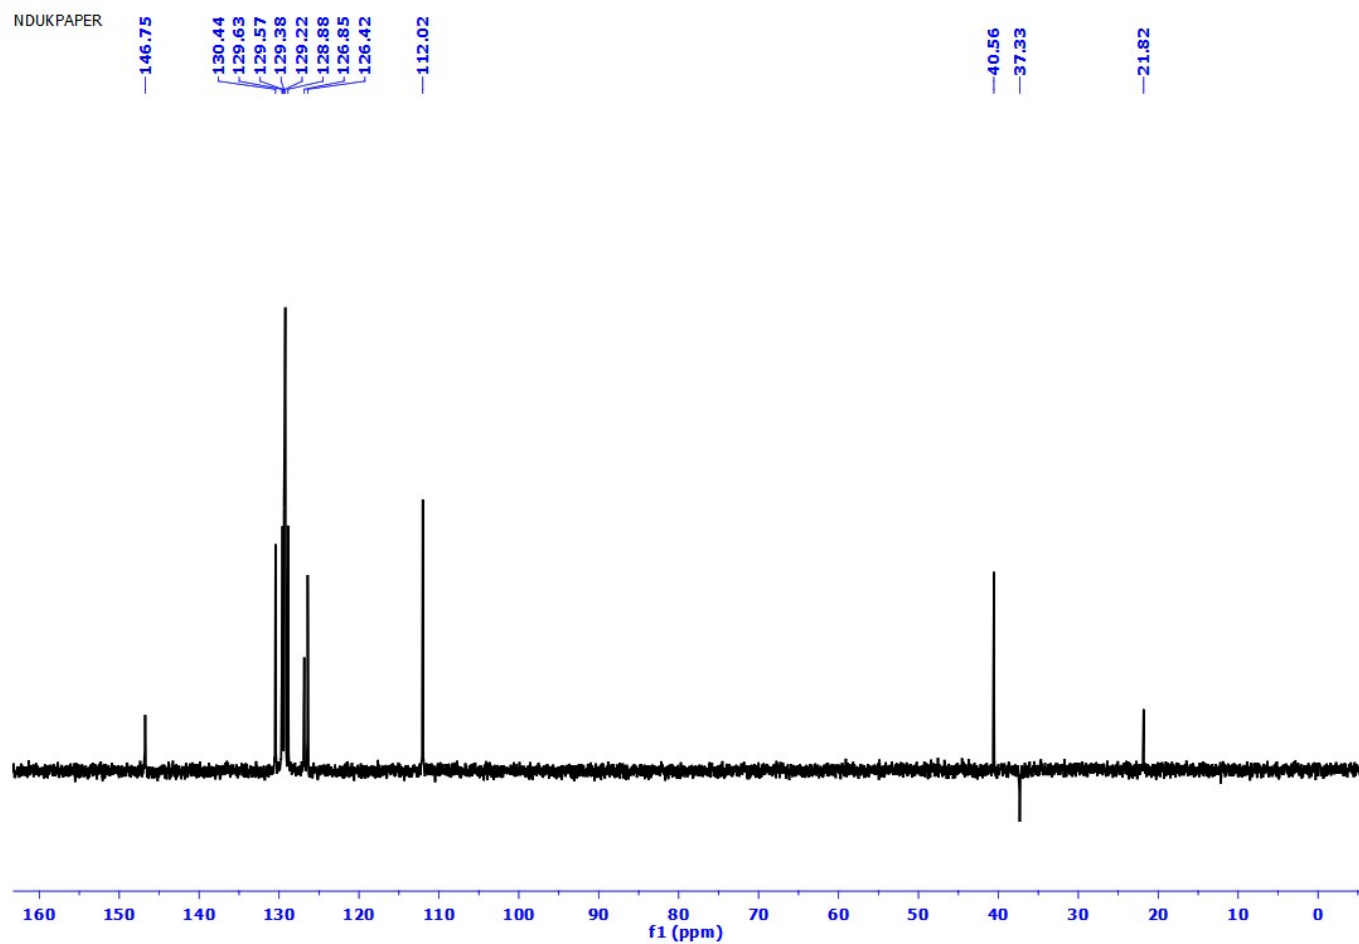

Figure S3. DEPT-135 spectrum of AVM

NDUK\_150518153207 (1) #57 RT: 0.84 AV: 1 NL: 1.11E4  
T: ITMS + c ESI Full ms [50.00-1500.00]

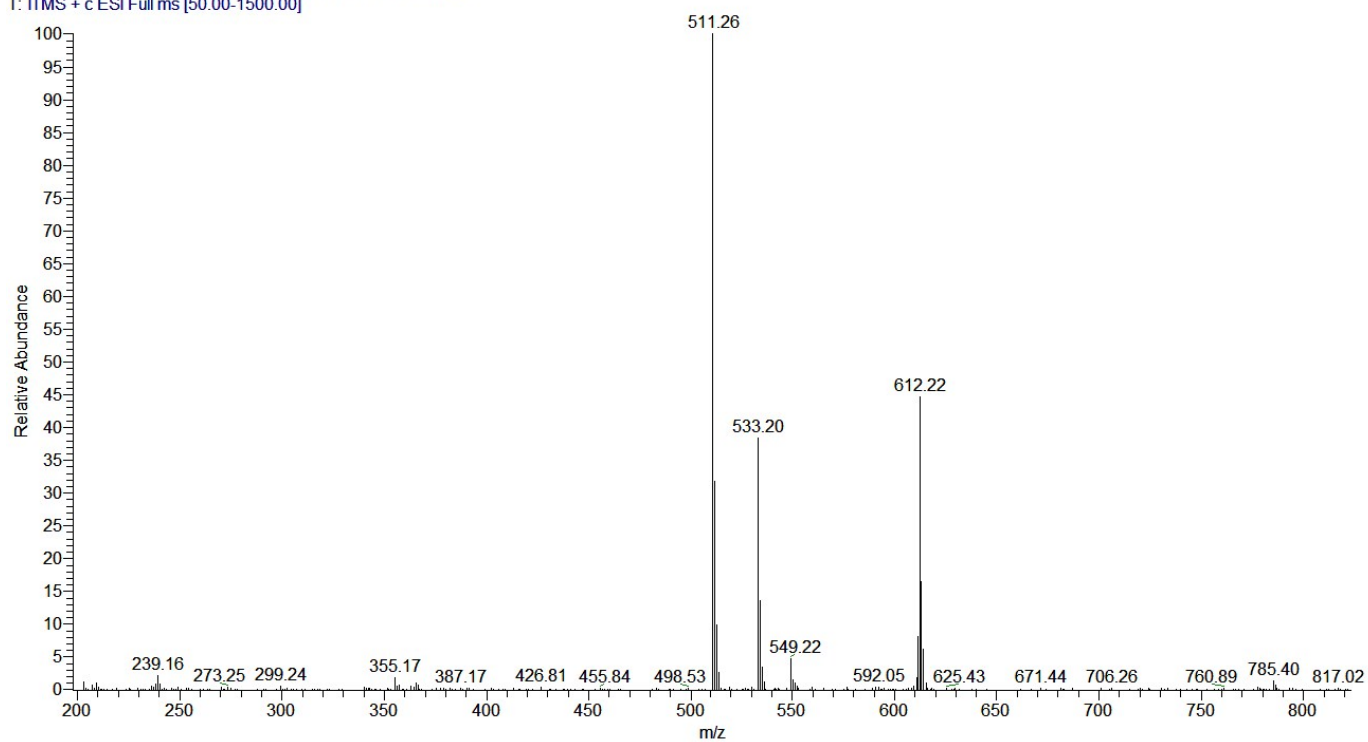

**Figure S4.** Mass spectrum of AVM

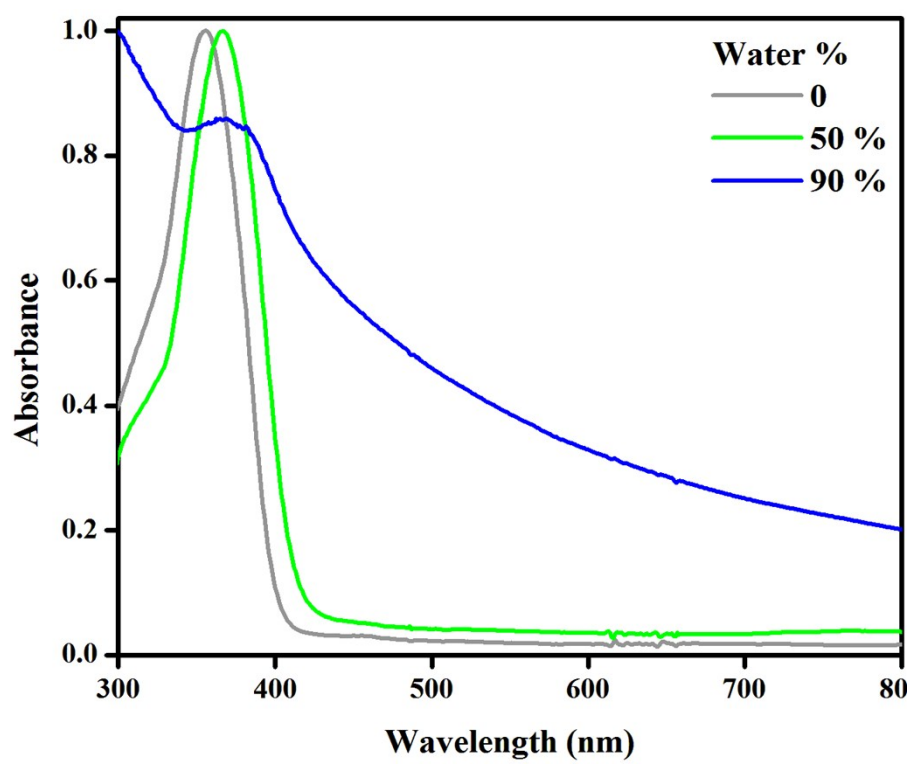

**Figure S5.** UV-vis spectrum of AVM ( $1 \times 10^{-5}$  M) in THF and THF–water mixtures



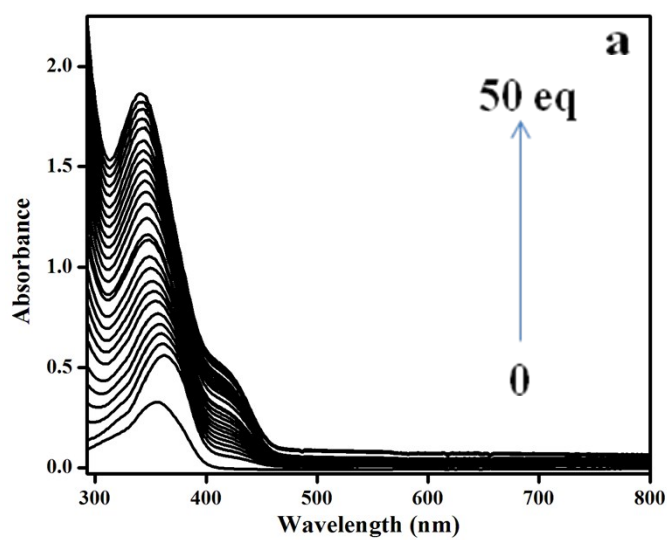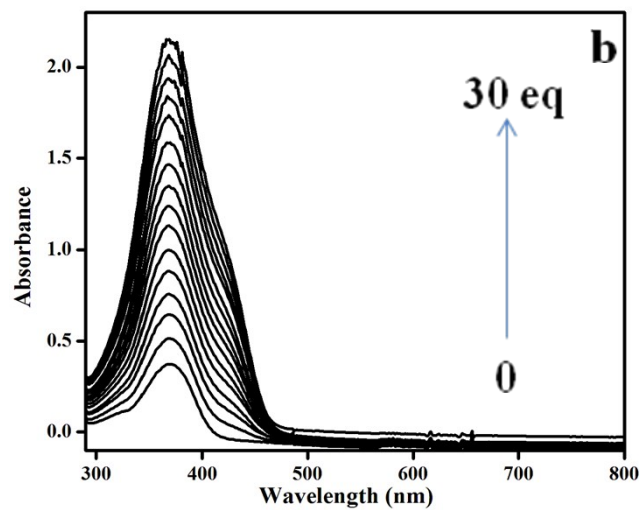

**Figure S6.** UV-vis spectral changes of AVM ( $1 \times 10^{-5}$  M) containing different concentration of PA in THF (a) and THF-water mixtures 50% (b) & 90% (c)

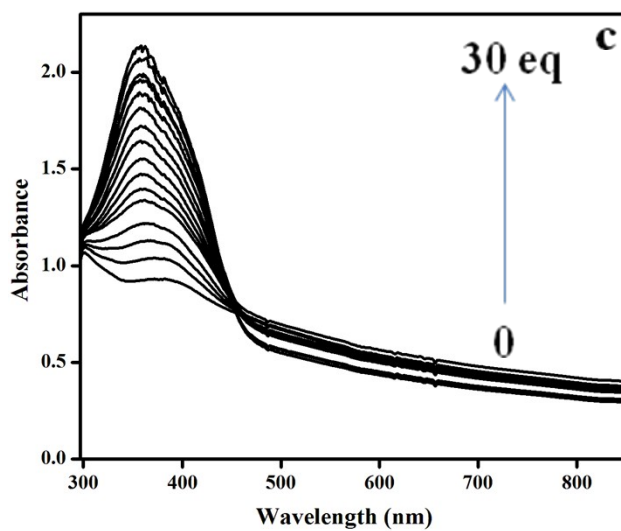

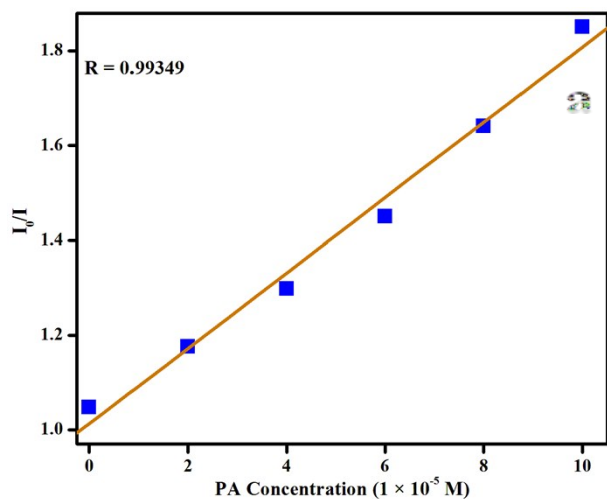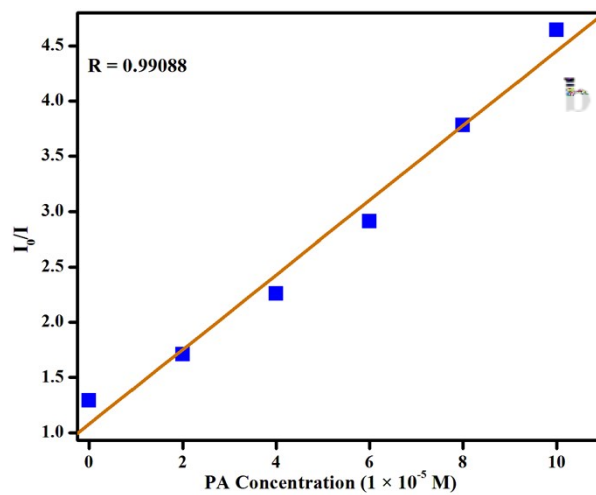

**Figure S7.** Stern-Volmer plot obtained at lower concentration of PA in THF (a) and THF–water mixtures 50% (b) & 90% (c)

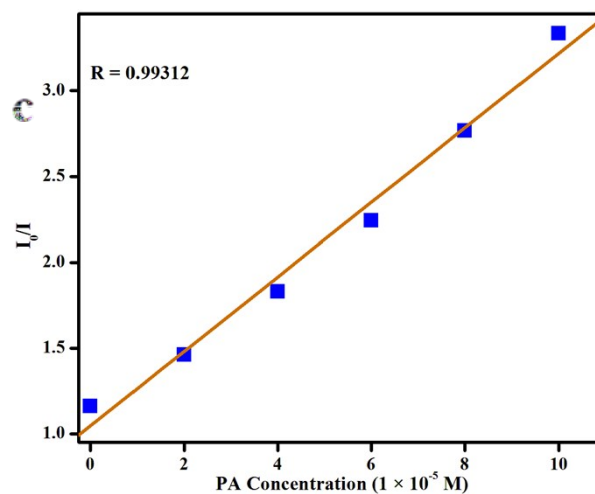

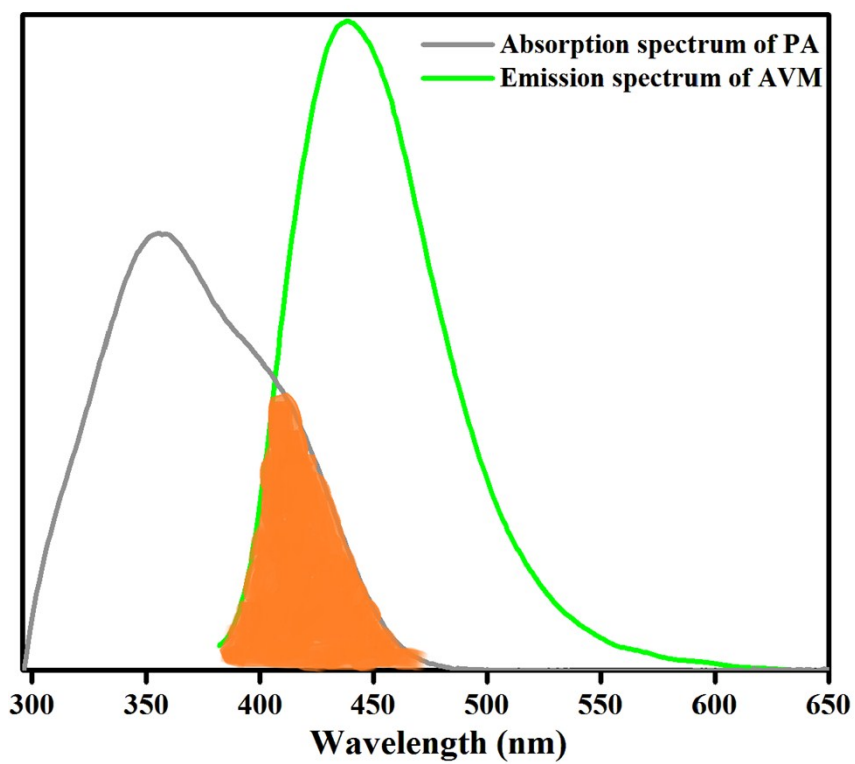

**Figure S8.** Spectral overlap between absorption spectra of PA and emission spectrum of AVM

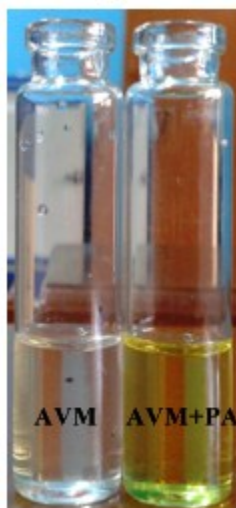

**Figure S9.** Visual color change upon mixing of PA with AVM

**Table S1. Optimized coordinates (Å) of AVM**

|   |            |            |            |
|---|------------|------------|------------|
| C | 4.4305060  | -0.9747070 | 0.5725640  |
| C | 5.1603040  | -2.1873930 | 0.4641650  |
| C | 4.4450850  | -3.3445430 | 0.0748660  |
| C | 3.0834110  | -3.2810990 | -0.1888180 |
| C | 2.3640480  | -2.0810940 | -0.0803420 |
| C | 3.0730700  | -0.9283540 | 0.3071400  |
| N | 6.5153340  | -2.2337070 | 0.7274460  |
| C | 7.2352850  | -3.4892610 | 0.6140200  |
| C | 7.2240360  | -1.0296360 | 1.1245040  |
| C | 0.9344240  | -2.0633040 | -0.3692870 |
| N | 0.2533530  | -0.9777620 | -0.2531390 |
| N | -1.1027690 | -0.9792530 | -0.5318390 |
| C | -1.7425480 | 0.2481610  | -0.4637120 |
| C | -1.7610920 | -2.1891810 | -0.9560470 |
| C | -3.2528440 | 0.2333480  | -0.6844920 |
| N | -1.0026200 | 1.2851400  | -0.2084780 |
| S | -1.6117160 | 2.8316510  | -0.0650990 |
| C | -4.0632910 | -0.2809790 | 0.5015200  |
| C | -0.0826310 | 3.7513990  | -0.2305490 |
| O | -2.4807810 | 3.2167920  | -1.1957270 |
| O | -2.1111120 | 3.0272820  | 1.3087350  |

|   |            |            |            |
|---|------------|------------|------------|
| C | 0.1143940  | 4.5527310  | -1.3508330 |
| C | 1.2924340  | 5.2953810  | -1.4569880 |
| C | 2.2709680  | 5.2475760  | -0.4587140 |
| C | 2.0416360  | 4.4341210  | 0.6637550  |
| C | 0.8732070  | 3.6907110  | 0.7872170  |
| C | -5.0682740 | -1.2343340 | 0.2939210  |
| C | -5.8571370 | -1.6856610 | 1.3529830  |
| C | -5.6450210 | -1.1928000 | 2.6410280  |
| C | -4.6467470 | -0.2407100 | 2.8564780  |
| C | -3.8625350 | 0.2174830  | 1.7966130  |
| C | 3.5442450  | 6.0525760  | -0.5722730 |
| C | -1.8595940 | -2.4826920 | -2.3204410 |
| C | -2.4449890 | -3.6810930 | -2.7306070 |
| C | -2.9105490 | -4.5930450 | -1.7803580 |
| C | -2.7919520 | -4.3055830 | -0.4190350 |
| C | -2.2164760 | -3.1041930 | -0.0032000 |
| H | 4.9343820  | -0.0615630 | 0.8665720  |
| H | 4.9528160  | -4.2965370 | -0.0231280 |
| H | 2.5636370  | -4.1896300 | -0.4869590 |
| H | 2.5336940  | 0.0098690  | 0.3930960  |
| H | 6.8427260  | -4.2505360 | 1.3034020  |
| H | 7.1857080  | -3.8988620 | -0.4050680 |
| H | 8.2858620  | -3.3246860 | 0.8587250  |
| H | 7.1666480  | -0.2481820 | 0.3536550  |

|   |            |            |            |
|---|------------|------------|------------|
| H | 6.8290960  | -0.6104920 | 2.0609220  |
| H | 8.2770330  | -1.2689360 | 1.2818070  |
| H | 0.4932000  | -3.0138630 | -0.6829670 |
| H | -3.5548650 | 1.2535300  | -0.9327930 |
| H | -3.4784550 | -0.3798300 | -1.5614170 |
| H | -0.6483150 | 4.5923060  | -2.1208280 |
| H | 1.4494150  | 5.9237650  | -2.3303410 |
| H | 2.7886410  | 4.3897310  | 1.4533040  |
| H | 0.6974400  | 3.0710250  | 1.6602260  |
| H | -5.2340810 | -1.6285650 | -0.7060170 |
| H | -6.6341550 | -2.4235980 | 1.1698020  |
| H | -6.2559200 | -1.5433270 | 3.4689160  |
| H | -4.4803040 | 0.1577390  | 3.8539520  |
| H | -3.1121000 | 0.9825060  | 1.9726690  |
| H | 3.5750170  | 6.6246950  | -1.5045870 |
| H | 3.6424930  | 6.7617760  | 0.2590450  |
| H | 4.4291960  | 5.4045290  | -0.5472710 |
| H | -1.4803930 | -1.7698680 | -3.0472300 |
| H | -2.5317200 | -3.9035960 | -3.7904040 |
| H | -3.3631510 | -5.5273040 | -2.1010100 |
| H | -3.1545130 | -5.0121240 | 0.3220350  |
| H | -2.1277690 | -2.8628750 | 1.0509960  |

**Energy** = -1928.79628458 A.U.

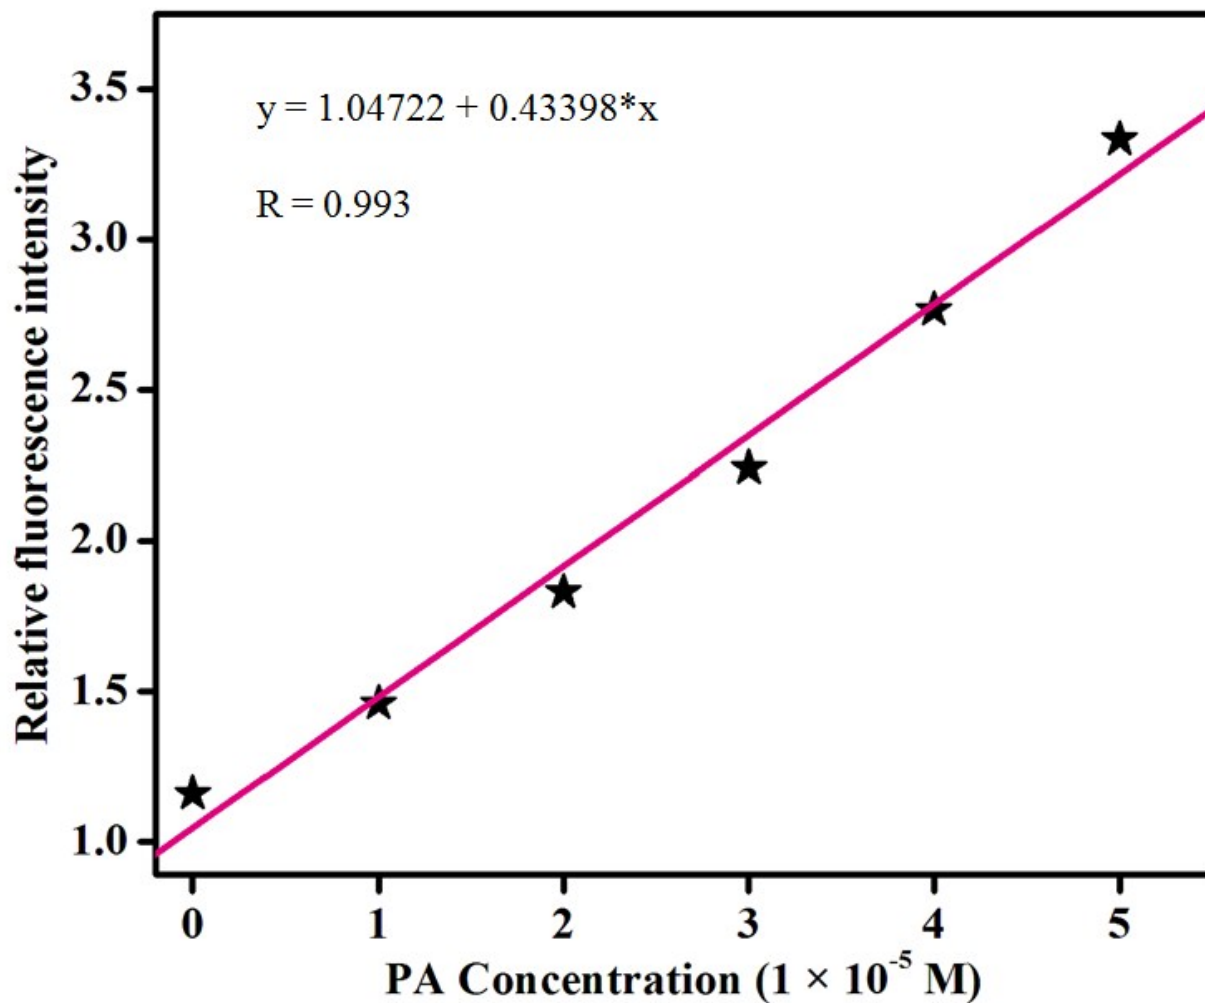

**Figure S10.** Calibration plot for detection limit (LOD). The LOD was derived by using the formula  $3\sigma/\text{slope}$ , where  $\sigma$  is the standard deviation of the blank (5 samples) and slope was obtained from linear calibration curve.

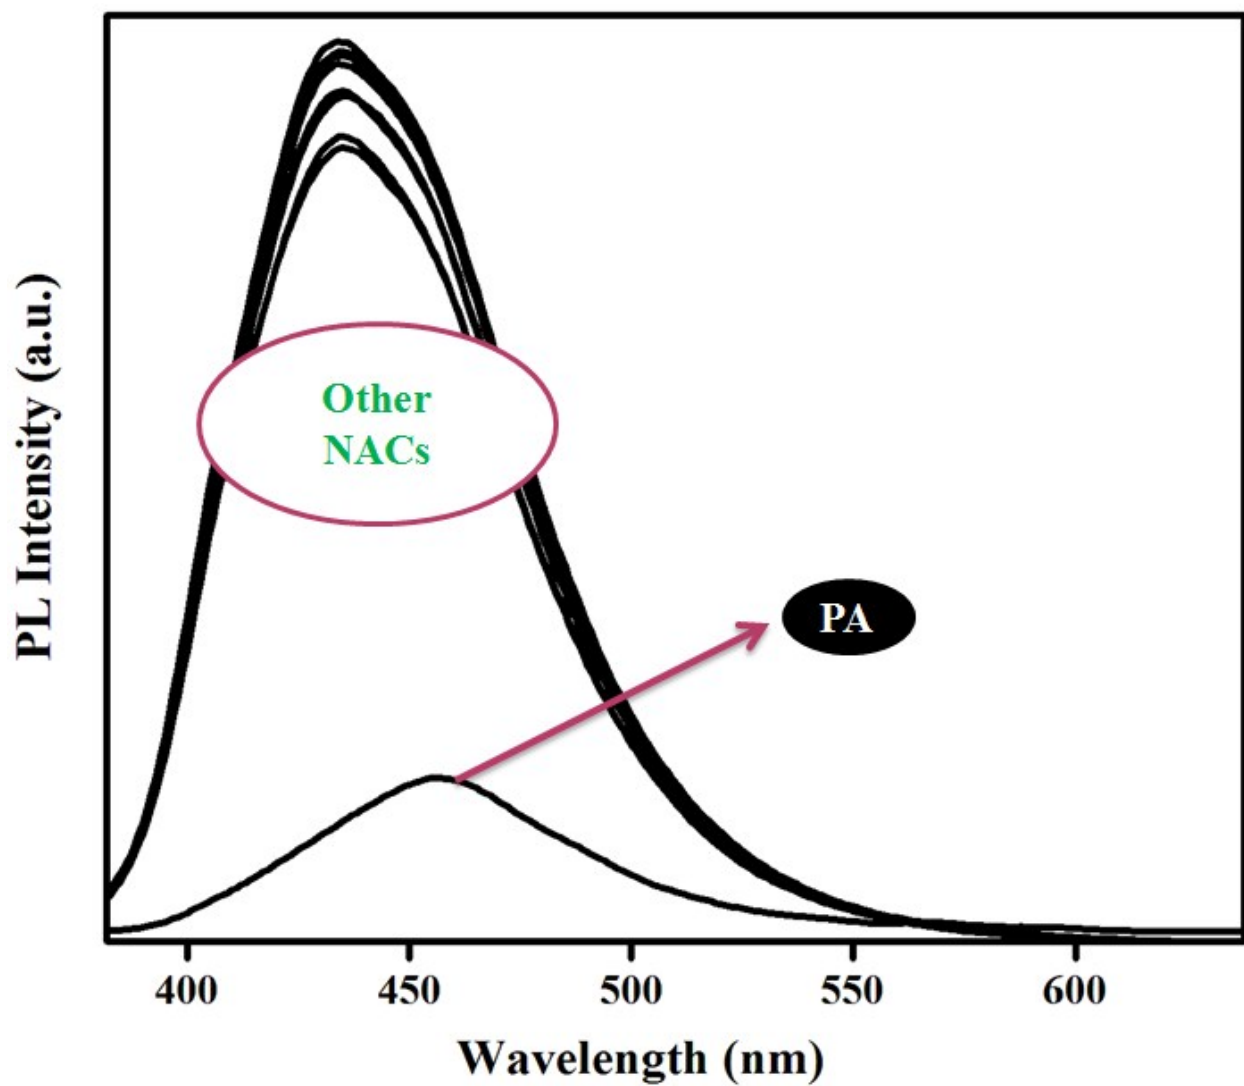

**Figure S10.** Fluorescence changes of nanoaggregates of AVM (90% water fraction) in the presence of other NACs
